# Supplementary material for: Perception and Experiences of Sexual Harassment among Women Working in Hospitality Workplaces of Bahir Dar city, Northwest Ethiopia: A qualitative study
Source: Research Square preprint supplement (doi:10.21203/rs.3.rs-57397/v2), 2020-12-14
Supplement: Supplementary file 1 [file cdda35d0ac8d2b01389fda35.docx]

**Table 1**. Consolidated criteria for reporting qualitative studies (COREQ): a 32-item checklist

| Item | Guide questions/description |  |
| --- | --- | --- |
| **Domain 1: Research team and reflexivity** | | |
| **Personal Characteristics** | | |
| 1. Interviewer/facilitator | Which author/s conducted the interview or focus group? | Methods, page 7-2nd paragraph |
| 1. Credentials | What were the researcher's credentials? E.g., Ph.D., MD | Methods, page 6- 1st paragraph |
| 1. Occupation | What was their occupation at the time of the study? | Methods, page 6- 1st paragraph |
| 1. Gender | Was the researcher male or female? | Methods, page 7-2nd paragraph |
| 1. Experience and training | What experience or training did the researcher have? | Discussion, page 29- first paragraph |
| **Relationship with participants** | | |
| 1. Relationship established | Was a relationship established before study commencement? | Methods, page 6-1st paragraph |
| 1. Participant knowledge of the interviewer | What did the participants know about the researcher? e.g., personal goals, reasons for doing the research | Methods, page 6-1st paragraph |
| 1. Interviewer characteristics | What characteristics were reported about the interviewer/facilitator? e.g., Bias, assumptions, reasons, and interests in the research topic | Methods, page 8- last two lines |
| **Domain 2: study design** | | |
| **Framework** | | |
| 1. Methodological orientation and theory | What methodological orientation was stated to underpin the study? e.g., grounded theory, discourse analysis, ethnography, phenomenology, content analysis | Methods, page No 5 and page 6 1st paragraph |
| **Participant selection** | | |
| 1. Sampling | How were the participants selected? e.g., purposive, convenience, consecutive, snowball | Methods, page No 6 |
| 1. Method of approach | How were participants approached? e.g., face-to-face, telephone, mail, email | Methods, page No 6 |
| 1. Sample size | How many participants were in the study? | Methods, page No 6 |
| 1. Non-participation | How many people refused to participate or dropped out? Reasons? | NA |
| **Setting** | | |
| 1. The setting of data collection | Where was the data collected? e.g., home, clinic, workplace | Methods, page No 7-1st & 2nd paragraph |
| 1. Presence of non-participants | Was anyone else present besides the participants and researchers? | Methods, page 5-last paragraph |
| 1. Description of sample | What are the essential characteristics of the sample? e.g., demographic data, date | Methods, page 5-last paragraph |
| **Data collection** | | |
| 1. Interview guide | Were questions, prompts, guides provided by the authors? Was its pilot-tested? | Methods, page 7 1st paragraph |
| 1. Repeat interviews | Were repeat interviews carried out? If yes, how many? | NA |
| 1. Audio/visual recording | Did the research use the audio or visual recording to collect the data? | Methods, page 7 2nd & last paragraph |
| 1. Fieldnotes | Were field notes made during and after the interview or focus group? | Methods, page 7 last paragraph |
| 1. Duration | What was the duration of the interviews or focus groups? | Methods, page 7 2nd paragraph |
| 1. Data saturation | Was the data saturation discussed? | Methods. Page 6 1st paragraph |
| 1. Transcripts returned | Were transcripts returned to participants for comment and correction? | Methods, page 8 last paragraph |
| **Domain 3: analysis and findings** | | |
| **Data analysis** | | |
| 1. Number of data coders | How many data coders coded the data? | Methods, page 8 1st paragraph |
| 1. Description of the coding tree | Did the authors describe the coding tree? | Methods, page 8 1st paragraph |
| 1. Derivation of themes | Were themes identified in advance or derived from the data? | Methods, page 8 1st paragraph |
| 1. Software | What software, if applicable, was used to manage the data? | Methods, page 8 1st paragraph |
| 1. Participant checking | Did participants provide feedback on the findings? | Methods, page 8 last paragraph |
| **Reporting** | | |
| 1. Quotations presented | Were participant quotations presented to illustrate the themes/findings? Was each quotation identified? e.g., participant number | Results, page 9-23 |
| 1. Data and findings consistent | Was there consistency between the data presented and the findings? | Methods, page 8 last paragraph |
| 1. Clarity of major themes | Were significant themes presented in the findings? | Results, page 9 |
| 1. Clarity of minor themes | Is there a description of several cases or discussions of minor themes? | Results, page 9, 9-23 |
